# Supplementary material
Source: PubMed Central journal article supplement (PMC5882506)
Supplement: NIHMS935048-supplement-6.pdf [file NIHMS935048-supplement-6.pdf]

Fig S2

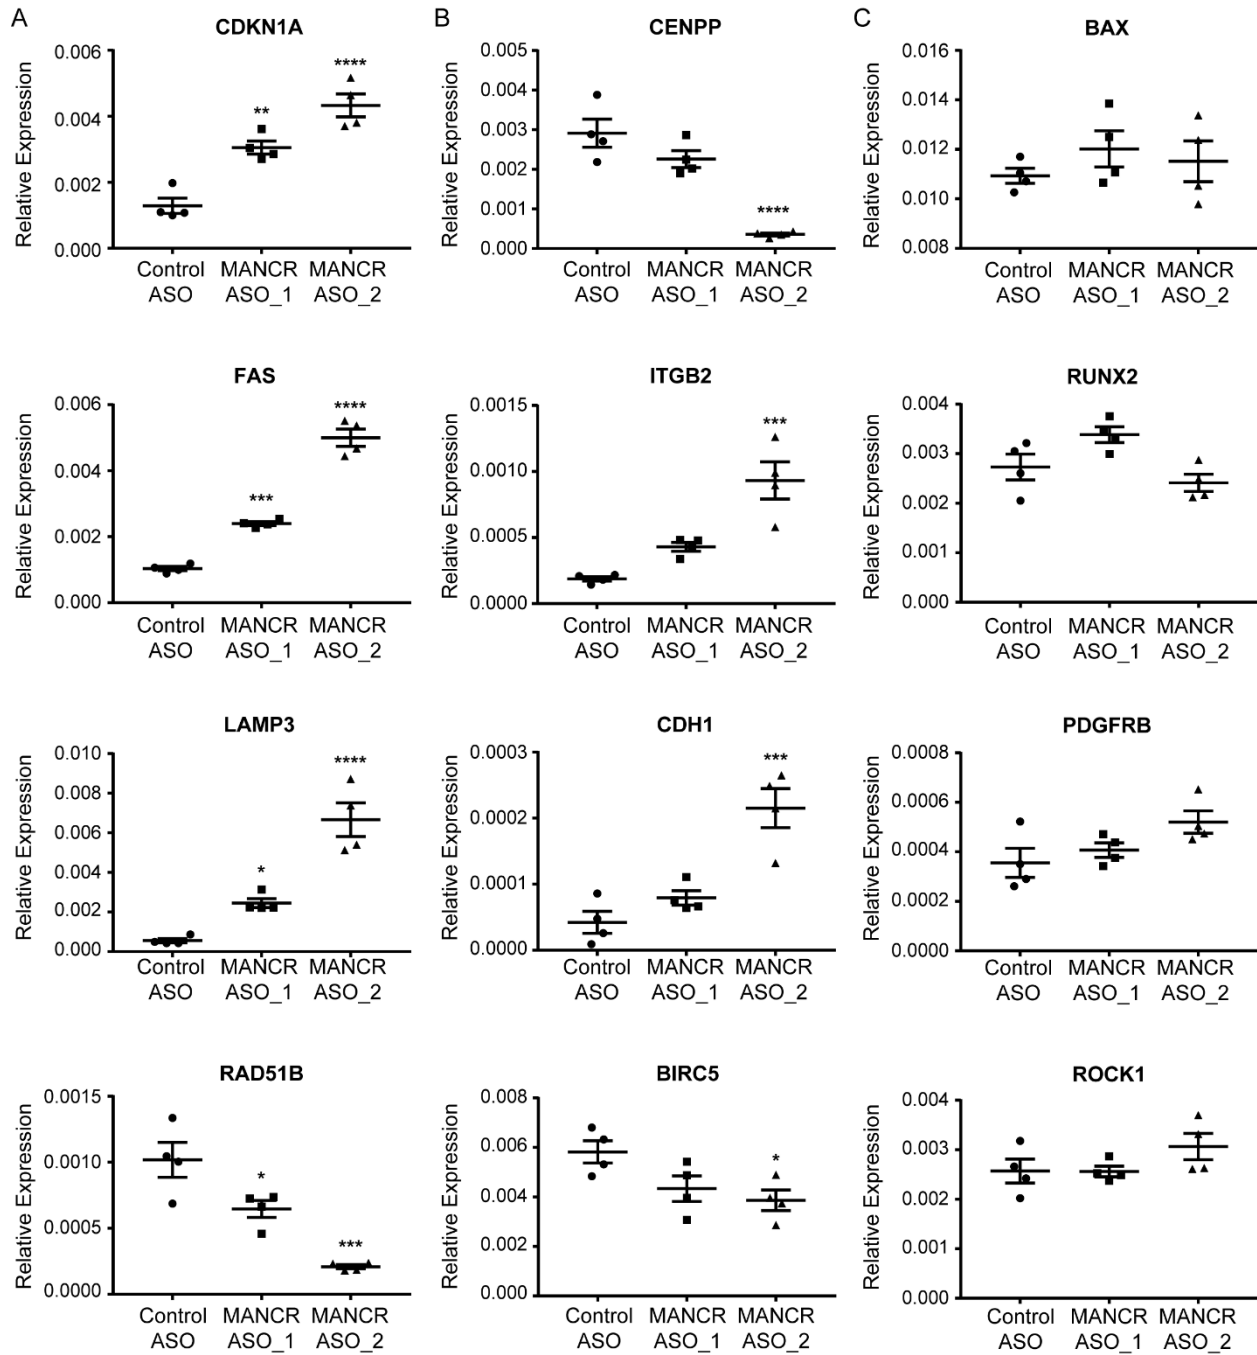

**Supplemental Figure 2. Validation of expressed genes from RNA-seq.** MDA-MB-231 cells transfected with control ASO or an ASO directed against MANCR (MANCR ASO\_1 or ASO\_2) were analyzed for gene expression by RT-qPCR, 48 hr after transfection, n=4. Gene expression is relative to GAPDH and ACTB. A) Differentially expressed genes that validated with both ASO\_1 and ASO\_2. B) Differentially expressed genes that validated with ASO\_2 and trended in the same direction with ASO\_1. C) Genes with unchanged expression that validated with both ASO\_1 and

ASO\_2. Data are presented as mean  $\pm$  S.E. Statistical significance was determined using one-way ANOVA with multiple comparisons. \* $p > 0.05$ , \*\* $p > 0.01$ , \*\*\* $p < 0.001$ , \*\*\*\* $p > 0.0001$ .
