# Supplementary material
Source: PubMed Central journal article supplement (PMC5882506)
Supplement: NIHMS935048-supplement-7.pdf [file NIHMS935048-supplement-7.pdf]

Fig S3

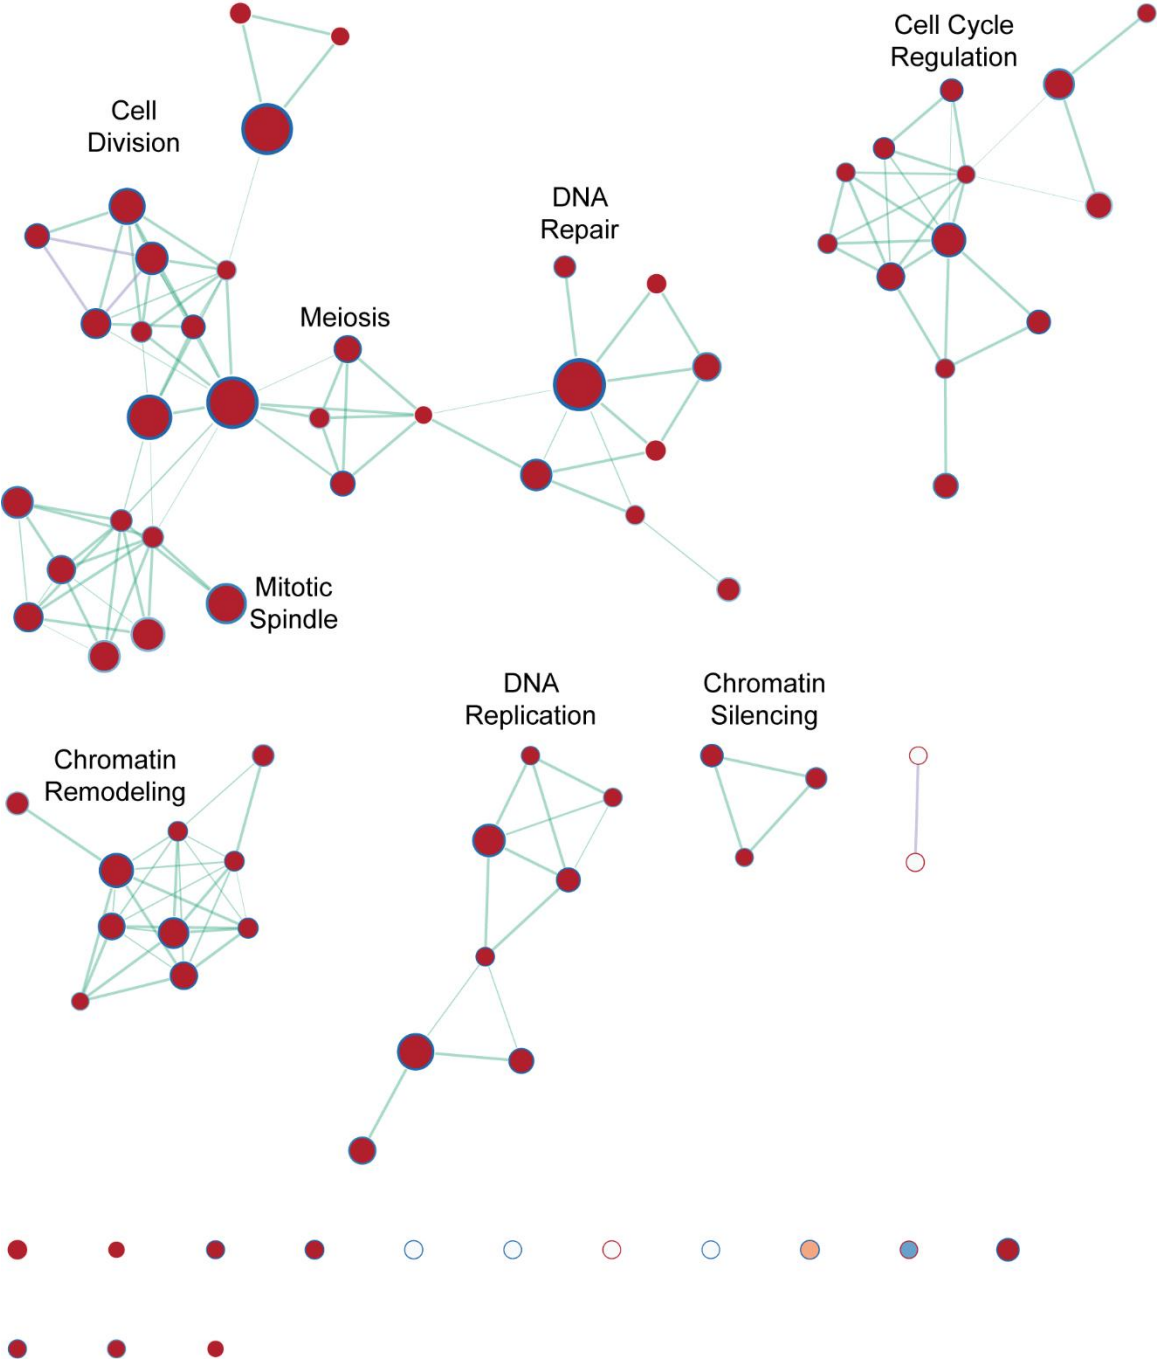

**Supplemental Figure 3. MANCR-depleted MDA-MB-231 cells exhibit a more normal-like expression of genes related to cell cycle processes.** Enrichment map of gene sets that are significantly enriched in MANCR-depleted vs control MDA-MB-231 cells (nodes) and MCF-10A vs MDA-MB-231 cells (node borders). Node color: red represents upregulated gene sets in control vs MANCR-depleted cells, blue represents downregulated gene sets in control vs MANCR-depleted cells. Node border color: blue represents downregulated gene sets in MCF-10A vs MDA-MB-231 cells, red represents upregulated gene sets in MCF-10A vs MDA-MB-231

cells. The thickness of an edge connecting two nodes represents the similarity coefficient between two nodes.
