# Supplementary material
Source: PubMed Central journal article supplement (PMC5882506)
Supplement: NIHMS935048-supplement-8.pdf [file NIHMS935048-supplement-8.pdf]

Fig S4

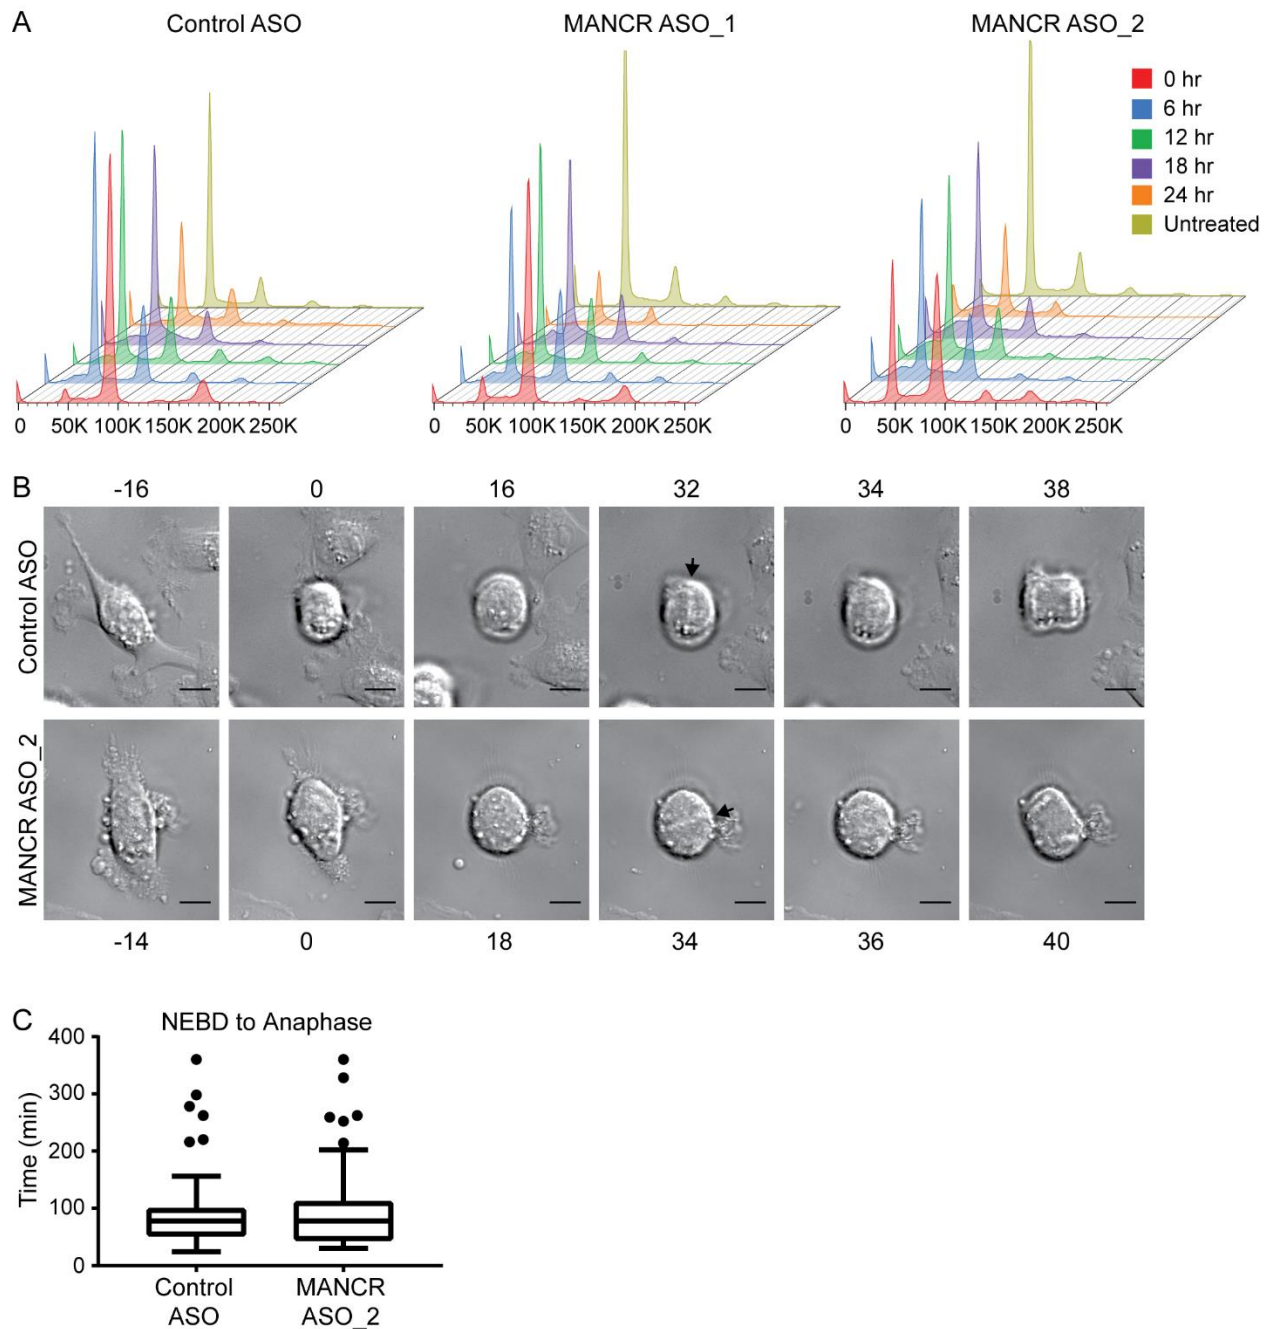

**Supplemental Figure 4. MANCR depletion does not affect timing of anaphase onset.** A) Representative cell cycle distribution of Control and MANCR-depleted cells that were synchronized 18 hr after transfection, then fixed and stained with PI every 6 hr after release from an 18 hr nocodazole block. 0 hr is at release (36 hr after transfection). B) Control and MANCR-depleted cells were imaged over a 16 hr period by differential interference contrast microscopy. Time 0 min is at nuclear envelope breakdown (NEBD). Black arrow heads indicate chromosomes aligned at the metaphase plate at 32 min (Control ASO) and 34 min (MANCR ASO). Scale bars represent 10  $\mu$ m. C) Quantification of the time from NEBD to anaphase onset

in control (n=76) and MANCR-depleted (n=64) cells from 2 transfections. Data are presented as median, IQR, and  $\pm 1.5\text{IQR}$ . Statistical significance was determined using unpaired t-test.
